# Supplementary material
Source: HighWire-hosted journal article supplement (https://cmaj.ca/highwire/filestream/58941/field_highwire_adjunct_files/0/five-diabetes-appendix.pdf)
Supplement: five-diabetes-appendix.pdf [file five-diabetes-appendix.pdf]

## Appendix 1: References for the article “Five things to know about diabetic retinopathy”

### References

1. Mohamed Q, Gillies MC, Wong TY. Management of diabetic retinopathy: a systematic review. *JAMA* 2007;298:902-16.
2. Canadian Diabetes Association 2008 clinical practice guidelines for the prevention and management of diabetes in Canada. *Can J Diabetes* 2008;32(Suppl 1):s134-9.
3. Diabetes Control and Complications Trial Research Group. The effect of intensive treatment of diabetes on the development and progression of long-term complications in insulin-dependent diabetes mellitus. *N Engl J Med* 1993;329:977-86.
4. UK Prospective Diabetes Study (UKPDS) Group. Intensive blood-glucose control with sulphonylureas or insulin compared with conventional treatment and risk of complications in patients with type 2 diabetes (UKPDS 33). *Lancet* 1998;352:837-53.
5. Fraser-Bell S, Kaines A, Hykin PG. Update on treatments for diabetic macular edema. *Curr Opin Ophthalmol* 2008;19:185-9.
